# Supplementary material
Source: Springer Nature journal article supplement (https://www.springermedizin.de/resource/supplementary/12943_2012_1105_MOESM10_ESM.pdf/9552496)

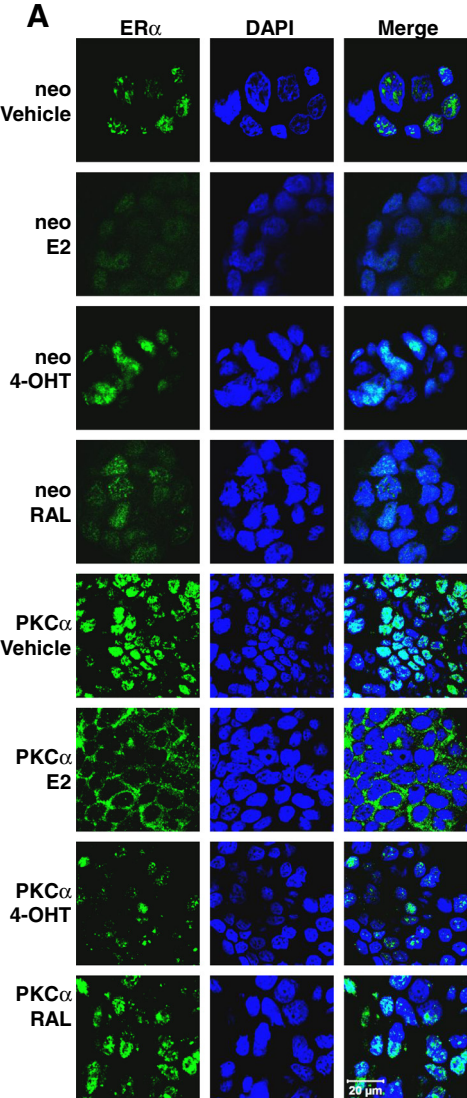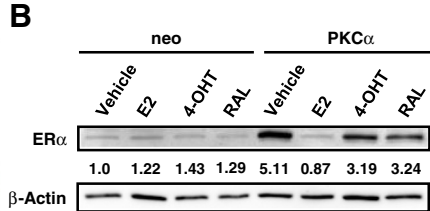

Supplement: MOESM10 [file 9552496]
